# Supplementary material
Source: PubMed Central journal article supplement (PMC3983380)
Supplement: jp409298f_si_001.pdf [file jp409298f_si_001.pdf]

## Supporting Information

# The Most Effective Size Gold Nanorod for Plasmonic Photothermal Therapy: Theory and Experiment

Megan A. Mackey, Moustafa R.K. Al<sup>†</sup>, Lauren A. Austin<sup>†</sup>, Rachel D. Near<sup>†</sup>, and Mostafa A. El-Sayed\*

*Laser Dynamics Laboratory, School of Chemistry and Biochemistry, Georgia Institute of  
Technology, Atlanta, Georgia, USA*

<sup>†</sup>Authors contributed equally to this work

\*Corresponding author: Mostafa A. El-Sayed, 901 Atlantic Drive, Atlanta, Georgia, 30332-0400,  
USA. phone: 404-894-0292, fax: 404-894-7452, email: [melsayed@gatech.edu](mailto:melsayed@gatech.edu)

**Table S1.** Additional temperature measurements taken for experimental photothermal heat conversion.

|                | $T_i$      | $T_f$<br>30 sec<br>irradiation | $T_i$      | $T_f$<br>1 min<br>irradiation | $T_i$      | $T_f$<br>2 min<br>irradiation |
|----------------|------------|--------------------------------|------------|-------------------------------|------------|-------------------------------|
| 38 nm<br>10 nM | $26 \pm 3$ | $69 \pm 3$                     | $23 \pm 3$ | $80 \pm 0$                    | $23 \pm 1$ | $82 \pm 5$                    |
| 28 nm<br>10 nM |            | $65 \pm 3$                     |            | $85 \pm 5$                    |            | $103 \pm 1$                   |
| 17 nm<br>10 nM |            | $40 \pm 2$                     |            | $49 \pm 3$                    |            | $62 \pm 2$                    |
| 17 nm<br>20 nM |            | $48 \pm 5$                     |            | $65 \pm 5$                    |            | $81 \pm 2$                    |

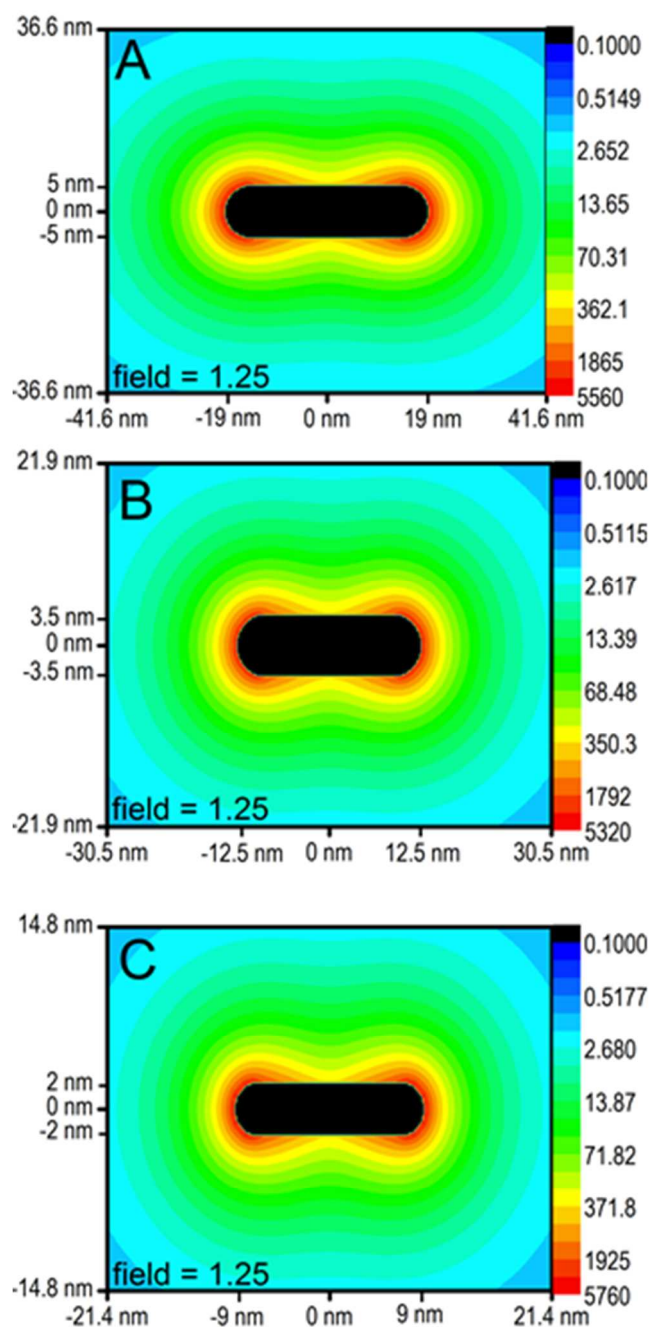

**Figure S1.** Field contour plots at the resonance wavelength for the longitudinal mode of (A) a 38 x 10 nm AuNR at a wavelength of 786. The field maximum is 5560. (B) A 25 x 7 nm AuNR at a wavelength of 757 nm. The field maximum is 5320. (C) An 18 x 4 nm AuNR at a wavelength of 865 nm, The field maximum is 5760. For all cases, the particle dimensions are indicated on the axes and the field has decayed to a value of 1.25 at the extremities of the plot. At the resonance condition, there is less than 10% difference between the maximum field enhancement values for the different sized AuNR, not corresponding to the experimental results.

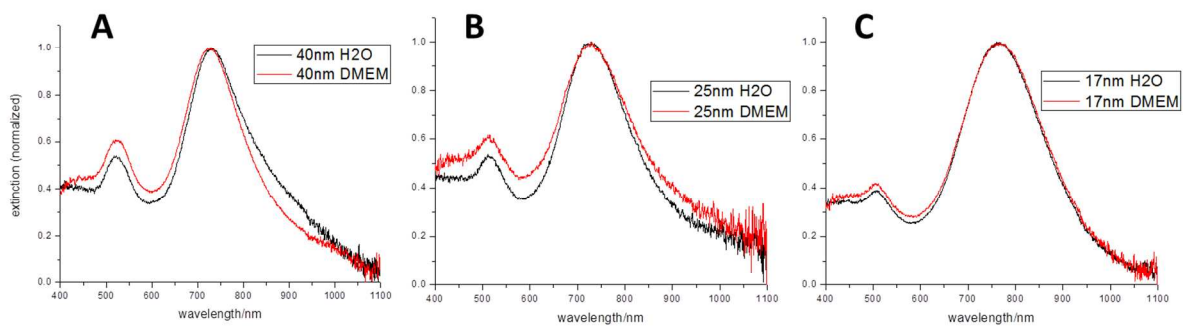

**Figure S2.** UV-Vis spectra of PEG-AuNRs in water (black) and in DMEM cell culture medium (red), showing no significant changes, indicative of PEG-AuNR stability in cell culture medium.
